# Supplementary material for: Time-Resolved Spectroscopic and Density Functional Theory Investigation of the Photogeneration of a Bifunctional Quinone Methide in Neutral and Basic Aqueous Solutions
Source: MDPI journal article supplement (doi:10.3390/molecules23123102), 2018-11-27
Supplement: s1 [file s1]

# Time-Resolved Spectroscopic and Density Functional Theory Study of the Photogeneration of a Bifunctional Quinone Methide in Neutral and Basic Aqueous Solutions

Zhiping Yan <sup>1</sup>, Lili Du <sup>1,\*</sup>, Xin Lan <sup>1</sup>, Yuanchun Li <sup>1</sup>, Wenchao Wang <sup>1</sup> and David Lee Phillips <sup>1,\*</sup>

<sup>1</sup> Department of Chemistry, The University of Hong Kong, Hong Kong S.A.R., China; mcayzp@gmail.com (Z.Y.); xinlan@connect.hku.hk (X.L.); fionalyc@connect.hku.hk (Y.L.); wenchao0909@126.com (W.W.)

\* Correspondence: justailleen@gmail.com (L.D.); phillips@hku.hk (D.L.P.); Tel.: +852-6761-4757 (L.D.); +852-2859-2160 (D.L.P.)

**Figure S1.** The fs-TA spectra of QMP-b obtained after 266 nm excitation in MeCN:H<sub>2</sub>O (a) from 1.52 ps to 2.91 ns (1:1, pH = 7), (b) from 2.32 ps to 2.86 ns (1:1, pH = 10).....**Error! Bookmark not defined.**

**Figure S2.** Ns-TA spectra of QMP-b after 266 nm photolysis in MeCN:H<sub>2</sub>O (1:1, pH = 12) mixed solutions.....S2

**Figure S3.** The fs-TA spectra of BQMP-b obtained after 266 nm excitation in MeCN:H<sub>2</sub>O (1:1, pH = 7) (a) from 224 fs to 828 fs, (b) from 828 fs to 20.8 ps, (c) from 20.8 ps to 2.83 ns.....S2

**Figure S4.** The fs-TA spectra of BQMP-b obtained after 266 nm excitation in MeCN:H<sub>2</sub>O (1:1, pH = 10) (a) from 159 fs to 742 fs, (b) from 742 fs to 34.8 ps, (c) from 34.8 ps to 2.83 ns..**Error! Bookmark not defined.**

**Figure S5.** Schematic depiction of the optimized structures of the ground state of BQMP-b<sup>-</sup> (left) and singlet excited state of BQMP-b<sup>-</sup> (right) obtained from B3LYP/6-311G\*\* DFT calculations. Selected bond lengths (in Å) are labeled in the structures.....**Error! Bookmark not defined.**

**Figure S6.** Shown are the 416 nm probe ns-TR<sup>3</sup> spectra obtained after 266 nm photolysis of BQMP-b in MeCN:H<sub>2</sub>O (1:1) mixed solvent with pH = 12. ....**Error! Bookmark not defined.**

**Figure S7.** Comparison of the ns-TR<sup>3</sup> spectra of BQMP-b obtained at 1 μs in pH = 7 and pH = 12 mixed solutions.....S4

**Figure S8.** Experimental TR<sup>3</sup> spectrum (at 1 μs) of BQMP-b observed in MeCN:H<sub>2</sub>O (1:1, pH = 12, 266 nm pump, 416 nm probe) compared to DFT computed Raman spectrum of BQM<sup>-</sup> species. ....S4

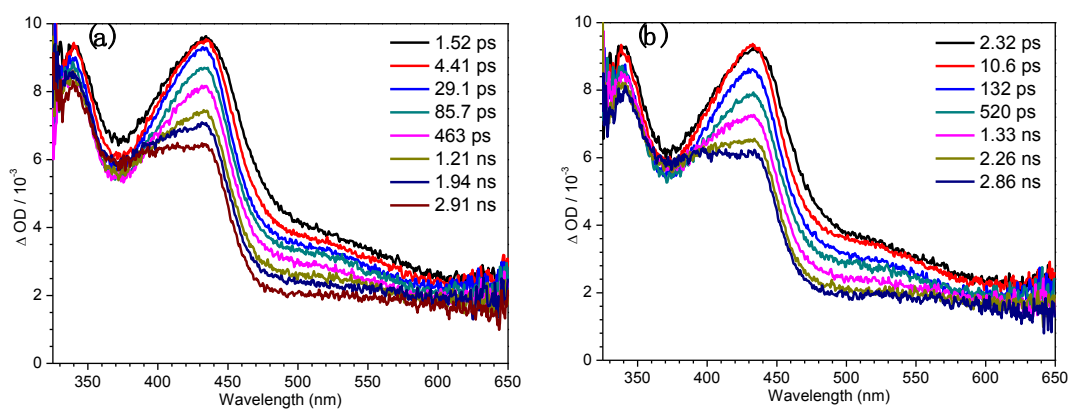

**Figure S1.** The fs-TA spectra of QMP-b obtained after 266 nm excitation in MeCN:H<sub>2</sub>O (a) from 1.52 ps to 2.91 ns (1:1, pH = 7), (b) from 2.32 ps to 2.86 ns (1:1, pH = 10).

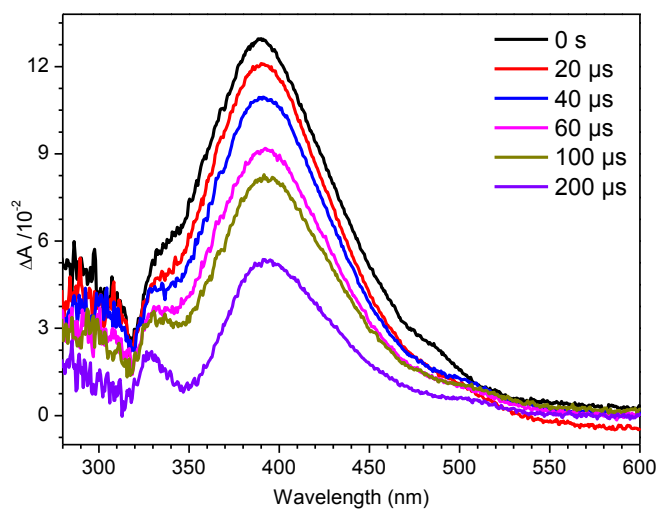

**Figure S2.** ns-TA spectra of QMP-b after 266 nm photolysis in MeCN:H<sub>2</sub>O (1:1, pH = 12) mixed aqueous solutions.

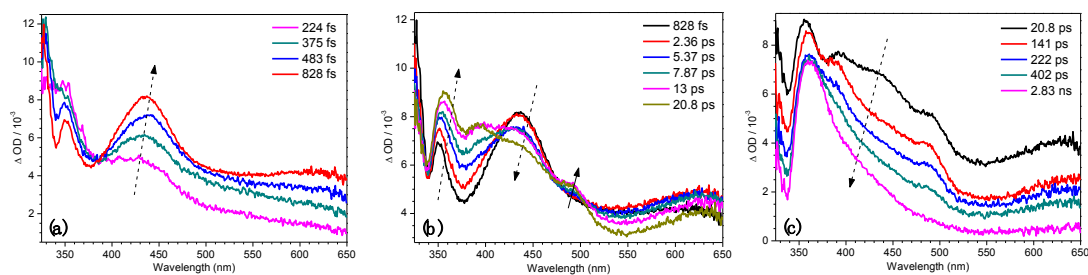

**Figure S3.** The fs-TA spectra of BQMP-b obtained after 266 nm excitation in MeCN:H<sub>2</sub>O (1:1, pH = 7) (a) from 224 fs to 828 fs, (b) from 828 fs to 20.8 ps, (c) from 20.8 ps to 2.83 ns.

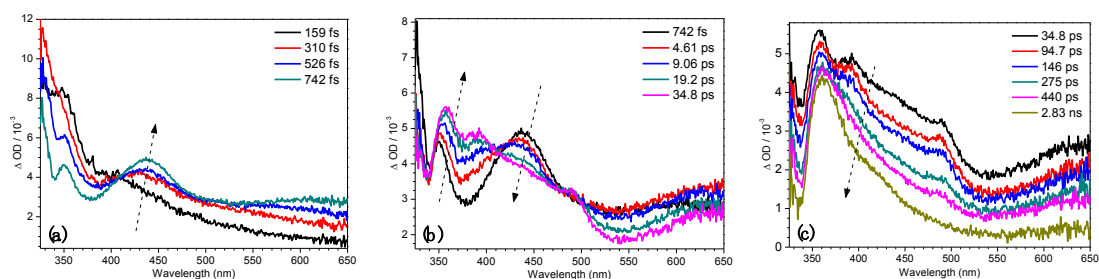

**Figure S4.** The fs-TA spectra of BQMP-b obtained after 266 nm excitation in MeCN:H<sub>2</sub>O (1:1, pH = 10) (a) from 159 fs to 742 fs, (b) from 742 fs to 34.8 ps, (c) from 34.8 ps to 2.83 ns.

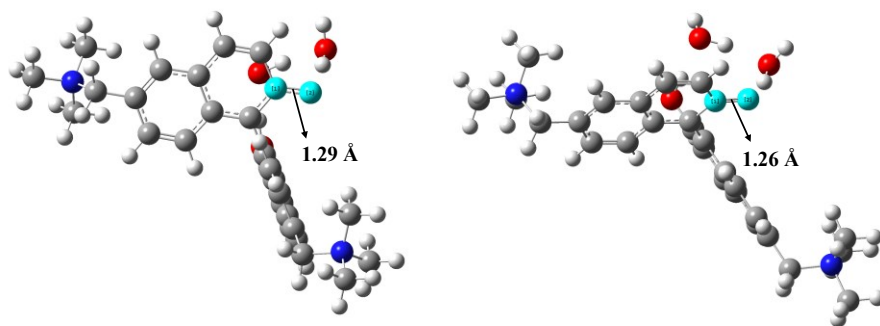

**Figure S5.** Schematic depiction of the optimized structures of the ground state of BQMP-b (left) and singlet excited state of BQMP-b (right) obtained from B3LYP/6-311G\*\* DFT calculations. Selected bond lengths (in Å) are labeled in the structures.

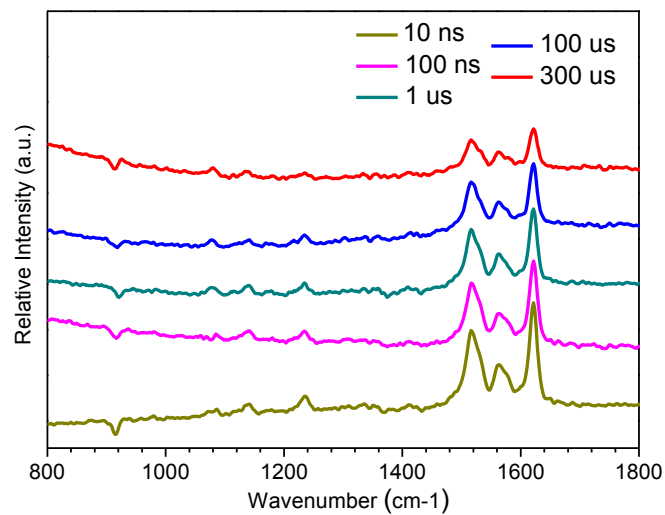

**Figure S6.** Shown are the 416 nm probe ns-TR<sup>3</sup> spectra obtained after 266 nm photolysis of BQMP-b in MeCN:H<sub>2</sub>O (1:1) mixed solvent with pH = 12.

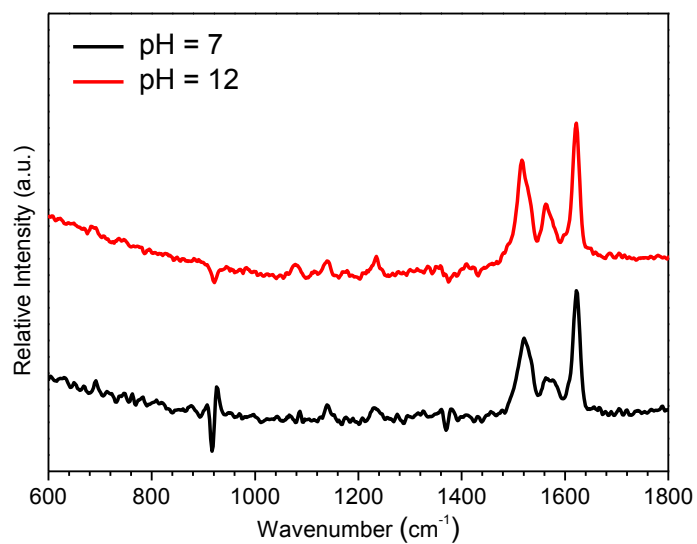

**Figure S7.** Comparison of the ns-TR<sup>3</sup> spectra of BQMP-b obtained at 1 µs in pH = 7 and pH = 12 mixed aqueous solutions.

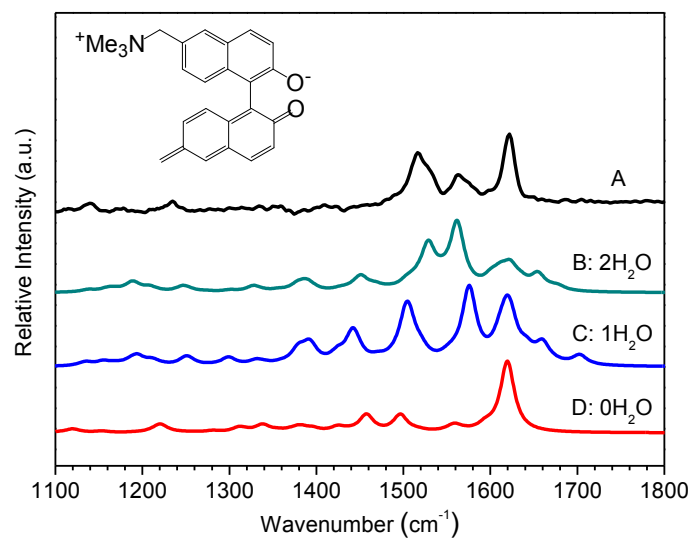

**Figure S8.** Experimental TR<sup>3</sup> spectrum (at 1us) of BQMP-b observed in MeCN:H<sub>2</sub>O (1:1, pH = 12, 266 nm pump, 416 nm probe) compared to DFT computed Raman spectrum of the BQM<sup>-</sup> species.
